# Supplementary material
Source: Springer Nature journal article supplement (https://www.springermedizin.de/resource/supplementary/12884_2012_732_MOESM7_ESM.pdf/9458500)

# Rate of Deliveries in a Health Centre

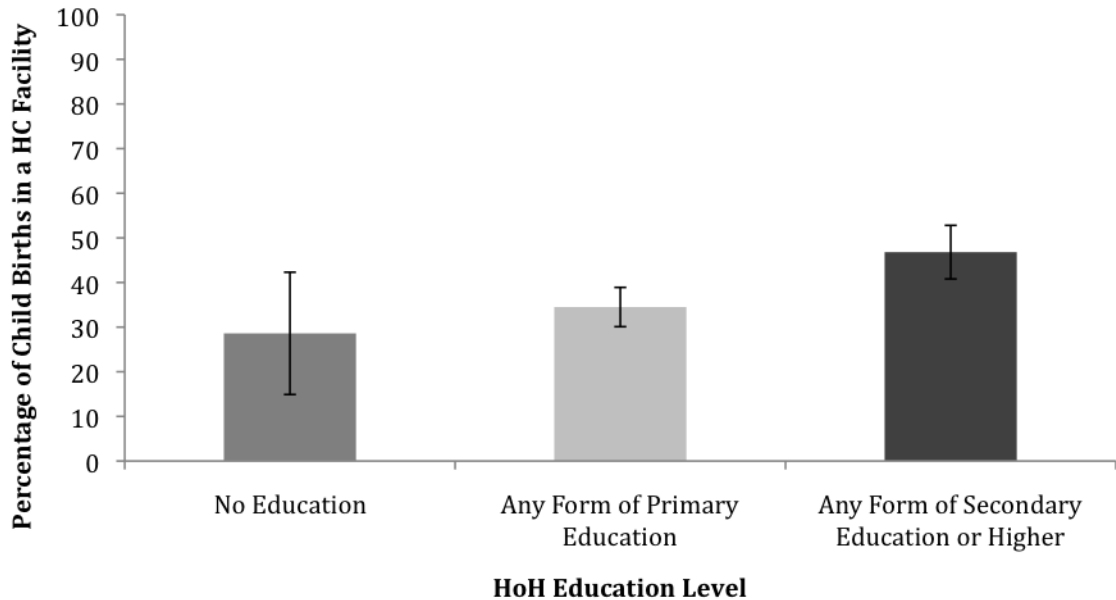

Supplement: MOESM7 [file 9458500]
